# Supplementary material for: What Does It Take to Synergistically Combine Sub-Potent Natural Products into Drug-Level Potent Combinations?
Source: PLOS journal article supplement (doi:10.1371/journal.pone.0049969), 2012-11-28
Supplement: S9 (10.1371/journal.pone.0049969.s009) [file journal.pone.0049969.s009]

**Supplementary Table S9** Targets and potency-enhancing molecular interaction modes in 9 fully sub-potent natural product combinations with potencies of the principal component increased by 10-100 fold

| Ingredient                          | Role in Combination                    | Dose Reduction Index | Target, Therapeutic Effect or Response (reference in Pubmed ID)                                                                                                                                   | Effect type              | Potency-Enhancing Synergistic Modes (reference in Pubmed ID)                                                                                                                                                                                                                                                             | Synergism Type                            |
|-------------------------------------|----------------------------------------|----------------------|---------------------------------------------------------------------------------------------------------------------------------------------------------------------------------------------------|--------------------------|--------------------------------------------------------------------------------------------------------------------------------------------------------------------------------------------------------------------------------------------------------------------------------------------------------------------------|-------------------------------------------|
| <b>Combination 1</b>                |                                        |                      |                                                                                                                                                                                                   |                          |                                                                                                                                                                                                                                                                                                                          |                                           |
| <b>Quillaja saponins (157ug/mL)</b> | <b>Principal therapeutic component</b> | 14.3                 | induced haemolysis by inserting into and forming pores in membrane, and altering Ca-K and Ca-Mn ATPase activities, and these activities are enhanced by its metabolism by glycosidases (19915999) | haemolysis               | affected cell membrane structure and enhanced permeability of anticancer agents by generating asymmetries and membrane tensions (21660740), thereby facilitating membrane insertion or crossing of Quillaja saponins and their subsequent metabolism by glycosidases located in the internal side of membrane (15340929) | Intracellular bioavailability enhancement |
|                                     |                                        |                      |                                                                                                                                                                                                   |                          |                                                                                                                                                                                                                                                                                                                          |                                           |
| thymol                              | sensitizer                             |                      | affected cell membrane structure and enhanced permeability by generating asymmetries and membrane tensions (21660740)                                                                             | permeability enhancement | .                                                                                                                                                                                                                                                                                                                        |                                           |
|                                     |                                        |                      |                                                                                                                                                                                                   |                          |                                                                                                                                                                                                                                                                                                                          |                                           |
| <b>Combination 2</b>                |                                        |                      |                                                                                                                                                                                                   |                          |                                                                                                                                                                                                                                                                                                                          |                                           |

|                            |                                 |     |                                                                                                                                                                                                                     |                                      |                                                                                                                                            |                                           |
|----------------------------|---------------------------------|-----|---------------------------------------------------------------------------------------------------------------------------------------------------------------------------------------------------------------------|--------------------------------------|--------------------------------------------------------------------------------------------------------------------------------------------|-------------------------------------------|
| Salicylaldehyde (141ug/mL) | Principal therapeutic component | >26 | inhibited fungal antioxidant system proteins cytosolic superoxide dismutase, mitochondrial SOD and glutathione reductase, thereby producing antifungal effect (20803256)                                            | antifungal                           | Linalool increased ROS species in certain cells by (19428344), which complements Salicylaldehyde's inhibition of fungal antioxidant system | complementary action                      |
|                            |                                 |     |                                                                                                                                                                                                                     |                                      |                                                                                                                                            |                                           |
| Linalool (281ug/mL)        | Cooperative                     | >78 | inhibited mitochondrial complexes and increased ROS species in certain cells by (19428344), both inhibition of mitochondrial function and ROS production may contribute to antifungal activity (16834605, 20803256) | antifungal                           |                                                                                                                                            |                                           |
|                            |                                 |     |                                                                                                                                                                                                                     |                                      |                                                                                                                                            |                                           |
| <b>Combination 3</b>       |                                 |     |                                                                                                                                                                                                                     |                                      |                                                                                                                                            |                                           |
| berberine (256ug/mL)       | Principal therapeutic component | 16  | inhibited microbial division protein FtsZ to produce antimicrobial effect (18275156, 21060782)                                                                                                                      | antimicrobial                        |                                                                                                                                            |                                           |
|                            |                                 |     | effluxed by a multidrug pump (10677479)                                                                                                                                                                             | Efflux-mediated multidrug resistance | 5'-methoxyhydrnocarpin inhibited the multidrug pump, thereby potentiated berberine's                                                       | Intracellular bioavailability enhancement |

|                                    |                           |    |                                                                                                                                                             |                                      |                                                                                   |                                           |
|------------------------------------|---------------------------|----|-------------------------------------------------------------------------------------------------------------------------------------------------------------|--------------------------------------|-----------------------------------------------------------------------------------|-------------------------------------------|
|                                    |                           |    |                                                                                                                                                             |                                      | antimicrobial activity (10677479)                                                 |                                           |
|                                    |                           |    |                                                                                                                                                             |                                      |                                                                                   |                                           |
| 5'-methoxyhydnocarpin<br>(10ug/mL) | sensitizer                |    |                                                                                                                                                             | potentiation                         |                                                                                   |                                           |
|                                    |                           |    |                                                                                                                                                             |                                      |                                                                                   |                                           |
| <b>Combination 4</b>               |                           |    |                                                                                                                                                             |                                      |                                                                                   |                                           |
| Linoleic acid (1mg/mL)             | co-therapeutic ingredient | 20 | inhibited bacterial enoyl-acyl carrier protein reductase FabI involved in fatty acid synthesis, thereby producing antibacterial effect (16146629, 21862391) | Antibacterial                        |                                                                                   |                                           |
|                                    |                           |    | effluxed by a farAB-encoded bacterial efflux pump (10447892)                                                                                                | Efflux-mediated multidrug resistance | Combination of Linoleic acid and Oleic acid inhibited bacterial efflux (21194895) | Intracellular bioavailability enhancement |
|                                    |                           |    | resisted by bacterial cell wall-anchored proteins SasF and SssF                                                                                             | Counteractive action                 |                                                                                   |                                           |
|                                    |                           |    |                                                                                                                                                             |                                      |                                                                                   |                                           |
| Oleic acid (1mg/mL)                | co-therapeutic ingredient | 20 | inhibited bacterial enoyl-acyl carrier protein reductase FabI involved in fatty acid synthesis, thereby producing antibacterial effect                      | Antibacterial                        |                                                                                   |                                           |

|                               |                                        |      |                                                                                                               |                                      |                                                                                                                                                                                               |                                           |
|-------------------------------|----------------------------------------|------|---------------------------------------------------------------------------------------------------------------|--------------------------------------|-----------------------------------------------------------------------------------------------------------------------------------------------------------------------------------------------|-------------------------------------------|
|                               |                                        |      | (16146629, 21862391)                                                                                          |                                      |                                                                                                                                                                                               |                                           |
|                               |                                        |      | effluxed by a farAB-encoded bacterial efflux pump (10447892)                                                  | Efflux-mediated multidrug resistance | Combination of Linoleic acid and Oleic acid inhibited bacterial efflux (21194895)                                                                                                             | Intracellular bioavailability enhancement |
|                               |                                        |      |                                                                                                               |                                      |                                                                                                                                                                                               |                                           |
| <b>Combination 5</b>          |                                        |      |                                                                                                               |                                      |                                                                                                                                                                                               |                                           |
| <b>eriodictyol (0.8mg/mL)</b> | <b>Principal therapeutic component</b> | 16.7 | produced prooxidative DNA damage effect (19941260), which may contribute to antimicrobial activity            | Antimicrobial                        | hesperetin has higher bioavailability (20447374) and is converted into eriodictyol in microbial culture by microbial enzymes (21873058), thereby enhancing the bioavailability of eriodictyol | Intracellular bioavailability enhancement |
| hesperetin (1mg/mL)           | Cooperative                            | 3.33 | reduced reducing the activity of bacterial enzymes (18812032), which may contribute to antimicrobial activity | Antimicrobial                        |                                                                                                                                                                                               |                                           |
|                               |                                        |      | interacted with membrane better, leading to higher bioavailability inside cells (20447374)                    | Bioavailability                      |                                                                                                                                                                                               |                                           |
|                               |                                        |      |                                                                                                               |                                      |                                                                                                                                                                                               |                                           |
| <b>Combination 6</b>          |                                        |      |                                                                                                               |                                      |                                                                                                                                                                                               |                                           |

|                               |                                        |      |                                                                                                                                                                    |                 |                                                                                                                                                                                                                |                                           |
|-------------------------------|----------------------------------------|------|--------------------------------------------------------------------------------------------------------------------------------------------------------------------|-----------------|----------------------------------------------------------------------------------------------------------------------------------------------------------------------------------------------------------------|-------------------------------------------|
| <b>eriodictyol (0.8mg/mL)</b> | <b>Principal therapeutic component</b> | 16.7 | produced prooxidative DNA damage effect (19941260), which may contribute to antimicrobial activity                                                                 | Antimicrobial   | Naringenin has higher bioavailability (2753859, 7603409, 8132524) and is converted into eriodictyol in microbial culture by microbial enzymes (21299115), thereby enhancing the bioavailability of eriodictyol | Intracellular bioavailability enhancement |
|                               |                                        |      |                                                                                                                                                                    |                 |                                                                                                                                                                                                                |                                           |
| Naringenin (1mg/mL)           | Cooperative                            | 2.5  | inhibited VacA vacuolation (15770537) to hinder the release of nutrients necessary for microbial growth and survival (12814772), leading to antimicrobial activity | Antimicrobial   |                                                                                                                                                                                                                |                                           |
|                               |                                        |      | interacted with membrane better (2753859), leading to higher bioavailability inside cells (7603409, 8132524)                                                       | Bioavailability |                                                                                                                                                                                                                |                                           |
|                               |                                        |      |                                                                                                                                                                    |                 |                                                                                                                                                                                                                |                                           |
| <b>Combination 7</b>          |                                        |      |                                                                                                                                                                    |                 |                                                                                                                                                                                                                |                                           |
| <b>Berberine (500ug/mL)</b>   | <b>Principal therapeutic component</b> | 16   | inhibited microbial division protein FtsZ to produce antimicrobial effect (18275156, 21060782)                                                                     | antimicrobial   |                                                                                                                                                                                                                |                                           |

|                             |                                        |       |                                                                                                   |                                      |                                                                                                             |                                           |
|-----------------------------|----------------------------------------|-------|---------------------------------------------------------------------------------------------------|--------------------------------------|-------------------------------------------------------------------------------------------------------------|-------------------------------------------|
|                             |                                        |       | effluxed by a multidrug pump (10677479)                                                           | Efflux-mediated multidrug resistance | biochanin A inhibited the multidrug pump, thereby potentiated berberine's antimicrobial activity (12952418) | Intracellular bioavailability enhancement |
|                             |                                        |       |                                                                                                   |                                      |                                                                                                             |                                           |
| biochanin A (>312.5ug/mL)   | Cooperative                            | >31.3 | inhibited microbial growth (20335979, 21328137)                                                   | antimicrobial                        |                                                                                                             |                                           |
|                             |                                        |       |                                                                                                   |                                      |                                                                                                             |                                           |
| <b>Combination 8</b>        |                                        |       |                                                                                                   |                                      |                                                                                                             |                                           |
| <b>Berberine (500ug/mL)</b> | <b>Principal therapeutic component</b> | 16    | inhibited microbial division protein FtsZ to produce antimicrobial effect (18275156, 21060782)    | antimicrobial                        |                                                                                                             |                                           |
|                             |                                        |       | effluxed by a multidrug pump (10677479)                                                           | Efflux-mediated multidrug resistance | Genistein inhibited the multidrug pump, thereby potentiated berberine's antimicrobial activity (12952418)   | Intracellular bioavailability enhancement |
|                             |                                        |       |                                                                                                   |                                      |                                                                                                             |                                           |
| Genistein (100ug/mL)        | Cooperative                            | 10    | inhibited global synthesis of DNA, RNA and proteins, leading to antimicrobial activity (16328542) | Antimicrobial                        |                                                                                                             |                                           |
|                             |                                        |       | stabilized covalent topoisomerase II-DNA cleavage complex, which may contribute to its            | Antimicrobial                        |                                                                                                             |                                           |

|                             |                                                |    |                                                                                                         |                                            |                                                                                                                 |                                                 |
|-----------------------------|------------------------------------------------|----|---------------------------------------------------------------------------------------------------------|--------------------------------------------|-----------------------------------------------------------------------------------------------------------------|-------------------------------------------------|
|                             |                                                |    | antimicrobial effect<br>(14738897)                                                                      |                                            |                                                                                                                 |                                                 |
|                             |                                                |    |                                                                                                         |                                            |                                                                                                                 |                                                 |
| <b>Combination 9</b>        |                                                |    |                                                                                                         |                                            |                                                                                                                 |                                                 |
| <b>Berberine (500ug/mL)</b> | <b>Principal<br/>therapeutic<br/>component</b> | 16 | inhibited microbial division<br>protein FtsZ to produce<br>antimicrobial effect<br>(18275156, 21060782) | antimicrobial                              |                                                                                                                 |                                                 |
|                             |                                                |    | effluxed by a multidrug<br>pump (10677479)                                                              | Efflux-mediated<br>multidrug<br>resistance | Orobol inhibited the multidrug<br>pump, thereby potentiated<br>berberine's antimicrobial activity<br>(12952418) | Intracellular<br>bioavailability<br>enhancement |
|                             |                                                |    |                                                                                                         |                                            |                                                                                                                 |                                                 |
| Orobol                      | sensitizer                                     |    | Orobol inhibited multidrug<br>pump (12952418)                                                           | potentiation                               |                                                                                                                 |                                                 |
