# Supplementary material for: What Does It Take to Synergistically Combine Sub-Potent Natural Products into Drug-Level Potent Combinations?
Source: PLOS journal article supplement (doi:10.1371/journal.pone.0049969), 2012-11-28
Supplement: S10 (10.1371/journal.pone.0049969.s010) [file journal.pone.0049969.s010]

**Supplementary Table S10** Targets and potency-enhancing molecular interaction modes in 5 fully sub-potent natural product combinations with potencies of a non-principal component increased by 10-100 fold

| Ingredient                                   | Role in Combination                     | Dose Reduction Index | Target, Therapeutic Effect or Response (reference in Pubmed ID) | Effect type          | Potency-Enhancing Synergistic Modes (reference in Pubmed ID)                                                                           | Synergism Type                            |
|----------------------------------------------|-----------------------------------------|----------------------|-----------------------------------------------------------------|----------------------|----------------------------------------------------------------------------------------------------------------------------------------|-------------------------------------------|
| <b>Combination 1</b>                         |                                         |                      |                                                                 |                      |                                                                                                                                        |                                           |
| <b>Vanillin (0.6mg/mL)</b>                   | <b>Principal therapeutic ingredient</b> | 8                    | inhibited CYP53A15 to produce antifungal effect (18505250)      | Antifungal           | (+/-)-pinosresinol caused damage to fungal plasma membrane(20657496) to enhance vanillin's transport across fungal membrane (15868144) | Intracellular bioavailability enhancement |
|                                              |                                         |                      | polymerized by laccase lacA to reduce its antifungal effect     | Counteractive action |                                                                                                                                        |                                           |
|                                              |                                         |                      | catabolized by vanillin dehydrogenase vdh (22057861)            | Counteractive action |                                                                                                                                        |                                           |
|                                              |                                         |                      |                                                                 |                      |                                                                                                                                        |                                           |
| 4-hydroxy-3-methoxycinnamaldehyde (0.4mg/mL) | Cooperative                             | 2                    | antifungal mechanism unreported                                 |                      |                                                                                                                                        |                                           |
|                                              |                                         |                      |                                                                 |                      |                                                                                                                                        |                                           |
| (+/-)-pinosresinol (1mg/mL)                  | Cooperative                             | 10                   | caused damage to                                                | Antifungal           |                                                                                                                                        |                                           |

|                                              |                                         |      |                                                                                     |                      |                                                                                             |                                           |
|----------------------------------------------|-----------------------------------------|------|-------------------------------------------------------------------------------------|----------------------|---------------------------------------------------------------------------------------------|-------------------------------------------|
|                                              |                                         |      | fungal plasma membrane to produce antifungal effect (20657496)                      |                      |                                                                                             |                                           |
|                                              |                                         |      |                                                                                     |                      |                                                                                             |                                           |
| <b>Combination 2</b>                         |                                         |      |                                                                                     |                      |                                                                                             |                                           |
| <b>Vanillin (0.6mg/mL)</b>                   | <b>Principal therapeutic ingredient</b> | 3    | inhibited CYP53A15 to produce antifungal effect (18505250)                          | Antifungal           | Scopoletin inhibited fungal efflux pumps (15826040)                                         | Intracellular bioavailability enhancement |
|                                              |                                         |      | polymerized by laccase lacA to reduce its antifungal effect                         | Counteractive action |                                                                                             |                                           |
|                                              |                                         |      | catabolized by vanillin dehydrogenase vdh (22057861)                                | Counteractive action | Scopoletin inhibited fungal oxidation of vanillin to enhance its bioavailability (15826040) | Intracellular bioavailability enhancement |
|                                              |                                         |      |                                                                                     |                      |                                                                                             |                                           |
| 4-Hydroxy-3-methoxycinnamaldehyde (0.4mg/mL) | Cooperative                             | 4    | antifungal mechanism unreported                                                     |                      |                                                                                             |                                           |
|                                              |                                         |      |                                                                                     |                      |                                                                                             |                                           |
| Scopoletin (1.5mg/mL)                        | Cooperative                             | 18.8 | hindered fungi survival or germination, inhibited detoxification enzymes (15826040) | Antifungal           |                                                                                             |                                           |
|                                              |                                         |      |                                                                                     |                      |                                                                                             |                                           |
| <b>Combination 3</b>                         |                                         |      |                                                                                     |                      |                                                                                             |                                           |

|                            |                                  |     |                                                                                                |                                      |                                                                                                                 |                                           |
|----------------------------|----------------------------------|-----|------------------------------------------------------------------------------------------------|--------------------------------------|-----------------------------------------------------------------------------------------------------------------|-------------------------------------------|
| berberine (125ug/mL)       | Principal therapeutic ingredient | 4.2 | inhibited microbial division protein FtsZ to produce antimicrobial effect (18275156, 21060782) | antimicrobial                        |                                                                                                                 |                                           |
|                            |                                  |     | effluxed by a multidrug pump (10677479)                                                        | Efflux-mediated multidrug resistance | chrysosplenol-D inhibited the multidrug pump, thereby potentiated berberine's antimicrobial activity (12494348) | Intracellular bioavailability enhancement |
| chrysosplenol-D (250ug/mL) | Cooperative                      | 10  | antimicrobial mechanism unreported                                                             |                                      |                                                                                                                 |                                           |
| <b>Combination 4</b>       |                                  |     |                                                                                                |                                      |                                                                                                                 |                                           |
| berberine (125ug/mL)       | Principal therapeutic ingredient | 4.2 | inhibited microbial division protein FtsZ to produce antimicrobial effect (18275156, 21060782) | antimicrobial                        |                                                                                                                 |                                           |
|                            |                                  |     | effluxed by a multidrug pump (10677479)                                                        | Efflux-mediated multidrug resistance | chrysosplenol-D inhibited the multidrug pump, thereby potentiated berberine's antimicrobial activity (12494348) | Intracellular bioavailability enhancement |
|                            |                                  |     |                                                                                                |                                      |                                                                                                                 |                                           |

|                           |                                         |      |                                                                                                                  |                                          |                                                                                                                                                                                 |                      |
|---------------------------|-----------------------------------------|------|------------------------------------------------------------------------------------------------------------------|------------------------------------------|---------------------------------------------------------------------------------------------------------------------------------------------------------------------------------|----------------------|
| chrysoplenetin (250ug/mL) | Cooperative                             | 40   | antimicrobial mechanism unreported                                                                               |                                          |                                                                                                                                                                                 |                      |
|                           |                                         |      |                                                                                                                  |                                          |                                                                                                                                                                                 |                      |
| <b>Combination 5</b>      |                                         |      |                                                                                                                  |                                          |                                                                                                                                                                                 |                      |
| <b>curcumin (3.1uM)</b>   | <b>Principal therapeutic ingredient</b> | 3.1  | downregulated Notch1 and Bcl-xL to inactivate NFkB, thereby promoting growth inhibition and apoptosis (16628653) | Anticancer, growth inhibition, apoptosis | isoflavone inhibited Notch, NFkB and Akt, and activated P53(22200028) to complement curcumin's action on Notch1 and Bcl-xL (16628653), thereby further promoting apoptosis      | Complementary action |
|                           |                                         |      | activated P38, thereby downregulating Bcl2, survivin and Akt signaling to promote apoptosis (19676105)           | Anticancer, apoptosis                    | isoflavone inhibited Notch, NFkB and Akt, and activated P53(22200028) to complement curcumin's action on Bcl2, survivin and Akt (19676105), thereby further promoting apoptosis | Complementary action |
|                           |                                         |      | inhibited AKT-mTOR pathway to promote anticancer effect (21450334)                                               | Anticancer, growth inhibition            |                                                                                                                                                                                 |                      |
|                           |                                         |      |                                                                                                                  |                                          |                                                                                                                                                                                 |                      |
| isoflavone (183uM)        | Cooperative                             | 18.3 | inhibited Notch, NFkB and Akt, and activated P53 to promote                                                      | Anticancer, apoptosis                    |                                                                                                                                                                                 |                      |

|  |  |  |                      |  |  |  |
|--|--|--|----------------------|--|--|--|
|  |  |  | apoptosis (22200028) |  |  |  |
|--|--|--|----------------------|--|--|--|
